# Supplementary material for: APOE ε4 carriage associates with improved myocardial performance from adolescence to older age
Source: Springer Nature journal article supplement (doi:10.1186/s12872-024-03808-z), 2024-03-21
Supplement: MOESM1 [file 26888712]

## **SUPPLEMENTARY MATERIAL FOR:**

### ***APOE* $\epsilon$ 4 carriage associates with improved myocardial performance from adolescence to older age**

Constantin-Cristian Topriceanu<sup>1,2,3</sup>, Mit Shah<sup>4,5</sup>, Matthew Webber<sup>1,2</sup>, Fiona Chan<sup>1,2</sup>, Hunain Shiwani<sup>2,3</sup>, Marcus Richards<sup>1</sup>, Jonathan Schott<sup>1,6</sup>, Nishi Chaturvedi<sup>1,2</sup>, James C Moon<sup>2,3</sup>, Alun D. Hughes<sup>1,2</sup>, Aroon D Hingorani<sup>2,7,8</sup>, Declan P. O'Regan<sup>4,5</sup>, Gabriella Captur<sup>1,2,3,9</sup>

#### **Author Affiliations:**

1. UCL MRC Unit for Lifelong Health and Ageing, University College London, London, UK
  2. UCL Institute of Cardiovascular Science, University College London, London, UK
  3. Cardiac MRI Unit, Barts Heart Centre, London, UK
  4. National Heart and Lung Institute, Imperial Centre for Translational and Experimental Medicine, Imperial College London, London, UK
  5. MRC London Institute of Medical Sciences, Imperial College London, London, UK
  6. Dementia Research Centre, UCL Queen Square Institute of Neurology, London, UK
  7. BHF Research Accelerator, University College London, London, UK
  8. Health Data Research, University College London, UK
  9. The Royal Free Hospital, Centre for Inherited Heart Muscle Conditions, Cardiology Department, London, UK
- 

#### **Corresponding author:**

Gabriella Captur

Consultant Cardiologist in Inherited Heart Muscle Conditions, Senior Clinical Lecturer

Institute of Cardiovascular Science, University College London, Gower Street, London WC1E 6BT, UK

E-mail: [gabriella.captur@ucl.ac.uk](mailto:gabriella.captur@ucl.ac.uk), Phone No: +44 2074600595



|                          |                                   |      |                      |       |                      |       |                      |       |                      |       |                      |       |                      |       |                      |       |
|--------------------------|-----------------------------------|------|----------------------|-------|----------------------|-------|----------------------|-------|----------------------|-------|----------------------|-------|----------------------|-------|----------------------|-------|
|                          | <i>APOE</i> $\epsilon 4$ carriers | 1315 | 1.01<br>(0.99, 1.04) | 0.207 | 1.01<br>(0.99, 1.03) | 0.537 | 1.01<br>(0.99, 1.03) | 0.226 | 1.02<br>(0.99, 1.04) | 0.152 | 1.02<br>(1.00, 1.05) | 0.053 | 1.01<br>(0.99, 1.04) | 0.231 | 1.01<br>(0.99, 1.04) | 0.190 |
| <b>LVPWT<sub>a</sub></b> | No <i>APOE</i> $\epsilon 4$       | ref  | ref                  | ref   | ref                  | ref   | ref                  | ref   | ref                  | ref   | ref                  | ref   | ref                  | ref   | ref                  | ref   |
|                          | <i>APOE</i> $\epsilon 4$ carriers | 1325 | 1.02<br>(1.00, 1.05) | 0.076 | 1.01<br>(0.99, 1.04) | 0.199 | 1.02<br>(1.00, 1.05) | 0.075 | 1.02<br>(0.99, 1.05) | 0.125 | 1.02<br>(0.99, 1.05) | 0.123 | 1.02<br>(0.99, 1.05) | 0.339 | 1.02<br>(1.00, 1.05) | 0.066 |
| <b>IVS<sub>s</sub></b>   | No <i>APOE</i> $\epsilon 4$       | ref  | ref                  | ref   | ref                  | ref   | ref                  | ref   | ref                  | ref   | ref                  | ref   | ref                  | ref   | ref                  | ref   |
|                          | <i>APOE</i> $\epsilon 4$ carriers | 1317 | 1.00<br>(0.98, 1.02) | 0.952 | 0.99<br>(0.97, 1.01) | 0.394 | 1.00<br>(0.98, 1.02) | 0.877 | 1.01<br>(0.98, 1.03) | 0.524 | 1.00<br>(0.98, 1.03) | 0.842 | 0.99<br>(0.97, 1.01) | 0.432 | 1.00<br>(0.98, 1.02) | 0.935 |
| <b>IVS<sub>a</sub></b>   | No <i>APOE</i> $\epsilon 4$       | ref  | ref                  | ref   | ref                  | ref   | ref                  | ref   | ref                  | ref   | ref                  | ref   | ref                  | ref   | ref                  | ref   |
|                          | <i>APOE</i> $\epsilon 4$ carriers | 1327 | 1.01<br>(0.98, 1.04) | 0.442 | 1.00<br>(0.98, 1.03) | 0.834 | 1.01<br>(0.98, 1.04) | 0.491 | 1.01<br>(0.98, 1.05) | 0.356 | 1.02<br>(0.99, 1.05) | 0.239 | 1.00<br>(0.97, 1.03) | 0.867 | 1.01<br>(0.98, 1.04) | 0.411 |

All reported analyses here consisted of generalized linear models with gamma distribution and log link. Significant *p*-values are highlighted in bold.

Model 2 was not adjusted for age in NSHD as all participants are age-matched.

*APOE*  $\epsilon 4$  = apolipoprotein  $\epsilon 4$ ;  $\beta$  = regression coefficient; *BMI* = body mass index; CI = confidence interval; CVD = cardiovascular disease; *EF* = ejection fraction; exp = exponentiated; HT = hypertension; *IVS<sub>s,d</sub>* = interventricular septal thickness in systole/diastole; *LVmass* = left ventricular mass, *LVPWT<sub>s,d</sub>* = left ventricular posterior wall thickness in systole/diastole; *M* = model; *MCF* = myocardial contraction fraction; *NSHD* = National Survey of Health and Development; *PDSR* = peak diastolic strain rate; ref = reference.

**Supplementary Table S2. Associations between *APOE*  $\epsilon 4$  genotypes and echocardiographic data at 60-64 years by comparing non-*APOE*  $\epsilon 4$  ( $\epsilon 2\epsilon 2$ ,  $\epsilon 2\epsilon 3$ ,  $\epsilon 2\epsilon 3$ ) with any *APOE*  $\epsilon 4$  ( $\epsilon 2\epsilon 4$ ,  $\epsilon 3\epsilon 4$  and  $\epsilon 4\epsilon 4$ ) genotypes in SABRE.**

| Outcome            | <i>APOE</i> $\epsilon 4$ status   | M1<br>(unadjusted) |                         |         | M2<br>(adjusted for age,<br>sex and SEP) |         | M3<br>(M2 + BMI)        |         | M4<br>(M2 + CVD)        |              | M5<br>(M2 + diabetes)   |         | M6<br>(M2 +<br>high cholesterol) |         | M7<br>(M2 + HT)         |         |
|--------------------|-----------------------------------|--------------------|-------------------------|---------|------------------------------------------|---------|-------------------------|---------|-------------------------|--------------|-------------------------|---------|----------------------------------|---------|-------------------------|---------|
|                    |                                   | n                  | Exp $\beta$<br>(95% CI) | p-value | Exp $\beta$<br>(95% CI)                  | p-value | Exp $\beta$<br>(95% CI) | p-value | Exp $\beta$<br>(95% CI) | p-value      | Exp $\beta$<br>(95% CI) | p-value | Exp $\beta$<br>(95% CI)          | p-value | Exp $\beta$<br>(95% CI) | p-value |
| EF                 | No <i>APOE</i> $\epsilon 4$       | ref                | ref                     | ref     | ref                                      | ref     | ref                     | ref     | ref                     | ref          | ref                     | ref     | ref                              | ref     | ref                     | ref     |
|                    | <i>APOE</i> $\epsilon 4$ carriers | 1160               | 1.02<br>(1.00,<br>1.04) | 0.134   | 1.02<br>(1.00,<br>1.04)                  | 0.153   | 1.02<br>(1.00,<br>1.04) | 0.144   | 1.01<br>(0.99,<br>1.03) | 0.228        | 1.01<br>(0.99,<br>1.03) | 0.228   | 1.02<br>(1.00,<br>1.05)          | 0.109   | 1.02<br>(1.00,<br>1.04) | 0.148   |
| E/e'               | No <i>APOE</i> $\epsilon 4$       | ref                | ref                     | ref     | ref                                      | ref     | ref                     | ref     | ref                     | ref          | ref                     | ref     | ref                              | ref     | ref                     | ref     |
|                    | <i>APOE</i> $\epsilon 4$ carriers | 1148               | 1.00<br>(0.96,<br>1.04) | 0.921   | 1.00<br>(0.95,<br>1.04)                  | 0.894   | 1.01<br>(1.00,<br>1.01) | 0.984   | 1.00<br>(0.96,<br>1.04) | 0.999        | 1.01<br>(0.97,<br>1.06) | 0.651   | 0.99<br>(0.93,<br>1.05)          | 0.679   | 1.03<br>(1.01,<br>1.06) | 0.968   |
| LVmass             | No <i>APOE</i> $\epsilon 4$       | ref                | ref                     | ref     | ref                                      | ref     | ref                     | ref     | ref                     | ref          | ref                     | ref     | ref                              | ref     | ref                     | ref     |
|                    | <i>APOE</i> $\epsilon 4$ carriers | 1161               | 1.00<br>(0.97,<br>1.04) | 0.918   | 1.01<br>(0.97,<br>1.04)                  | 0.752   | 1.01<br>(0.97,<br>1.04) | 0.710   | 1.00<br>(0.97,<br>1.04) | 0.829        | 1.01<br>(0.97,<br>1.05) | 0.656   | 1.01<br>(0.96,<br>1.06)          | 0.657   | 1.00<br>(0.97,<br>1.04) | 0.846   |
| MCF                | No <i>APOE</i> $\epsilon 4$       | ref                | ref                     | ref     | ref                                      | ref     | ref                     | ref     | ref                     | ref          | ref                     | ref     | ref                              | ref     | ref                     | ref     |
|                    | <i>APOE</i> $\epsilon 4$ carriers | 1158               | 1.03<br>(1.00,<br>1.06) | 0.102   | 1.03<br>(1.00,<br>1.07)                  | 0.0961  | 1.03<br>(1.00,<br>1.07) | 0.084   | 1.02<br>(0.99,<br>1.06) | 0.161        | 1.02<br>(0.99,<br>1.06) | 0.243   | 1.03<br>(0.99,<br>1.07)          | 0.211   | 1.03<br>(0.99,<br>1.06) | 0.141   |
| LVPWT <sub>s</sub> | No <i>APOE</i> $\epsilon 4$       | ref                | ref                     | ref     | ref                                      | ref     | ref                     | ref     | ref                     | ref          | ref                     | ref     | ref                              | ref     | ref                     | ref     |
|                    | <i>APOE</i> $\epsilon 4$ carriers | 1161               | 0.98<br>(0.96,<br>1.00) | 0.058   | 0.98<br>(0.96,<br>1.00)                  | 0.067   | 0.98<br>(0.97,<br>1.00) | 0.0571  | 0.98<br>(0.96,<br>1.00) | <b>0.046</b> | 0.98<br>(0.97,<br>1.00) | 0.104   | 0.99<br>(0.96,<br>1.01)          | 0.274   | 0.98<br>(0.96,<br>1.00) | 0.065   |

|                          |                                   |      |                         |       |                         |       |                         |       |                         |       |                         |       |                         |       |                         |       |
|--------------------------|-----------------------------------|------|-------------------------|-------|-------------------------|-------|-------------------------|-------|-------------------------|-------|-------------------------|-------|-------------------------|-------|-------------------------|-------|
| <b>LVPWT<sub>a</sub></b> | No <i>APOE</i> $\epsilon 4$       | ref  | ref                     | ref   | ref                     | ref   | ref                     | ref   | ref                     | ref   | ref                     | ref   | ref                     | ref   | ref                     | ref   |
|                          | <i>APOE</i> $\epsilon 4$ carriers | 1163 | 0.99<br>(0.97,<br>1.01) | 0.268 | 0.99<br>(0.97,<br>1.01) | 0.308 | 0.99<br>(0.97,<br>1.01) | 0.314 | 0.99<br>(0.97,<br>1.01) | 0.289 | 0.99<br>(0.97,<br>1.01) | 0.454 | 0.98<br>(0.95,<br>1.01) | 0.581 | 0.99<br>(0.97,<br>1.01) | 0.293 |
| <b>IVS<sub>s</sub></b>   | No <i>APOE</i> $\epsilon 4$       | ref  | ref                     | ref   | ref                     | ref   | ref                     | ref   | ref                     | ref   | ref                     | ref   | ref                     | ref   | ref                     | ref   |
|                          | <i>APOE</i> $\epsilon 4$ carriers | 1161 | 1.00<br>(0.98,<br>1.02) | 0.829 | 1.00<br>(0.98,<br>1.02) | 0.885 | 1.00 (0.98,<br>1.02)    | 0.934 | 1.00<br>(0.98,<br>1.02) | 0.836 | 1.00<br>(0.98,<br>1.02) | 0.983 | 1.00<br>(0.98,<br>1.03) | 0.946 | 1.00<br>(0.98,<br>1.02) | 0.948 |
| <b>IVS<sub>a</sub></b>   | No <i>APOE</i> $\epsilon 4$       | ref  | ref                     | ref   | ref                     | ref   | ref                     | ref   | ref                     | ref   | ref                     | ref   | ref                     | ref   | ref                     | ref   |
|                          | <i>APOE</i> $\epsilon 4$ carriers | 1163 | 1.00<br>(0.97,<br>1.02) | 0.782 | 1.00<br>(0.97,<br>1.02) | 0.822 | 1.00<br>(0.98,<br>1.02) | 0.856 | 1.00<br>(0.98,<br>1.02) | 0.899 | 1.00<br>(0.98,<br>1.03) | 0.862 | 1.00<br>(0.97,<br>1.04) | 0.788 | 1.00<br>(0.98,<br>1.02) | 0.986 |

All reported analyses here consisted of generalized linear models with gamma distribution and log link. Significant *p*-values are highlighted in bold.  
*SABRE*, Southall and Brent Revised. Other abbreviations as in **Supplementary Table S1**.

**Supplementary Table S3. Dose response of *APOE*  $\epsilon 4$  carriage when assessing the association between *APOE*  $\epsilon 4$  genotype and echocardiographic data in NSHD.**

| Outcome | Cohort     | Analysis                            | n    | M1<br>(unadjusted)      |         | M2<br>(adjusted for age, sex and SEP) |         | M3<br>(M2 + BMI)        |         | M4<br>(M2 + CVD)        |         | M5<br>(M2 + diabetes)   |         | M6<br>(M2 + high cholesterol) |         | M7<br>(M2 + HT)         |         |
|---------|------------|-------------------------------------|------|-------------------------|---------|---------------------------------------|---------|-------------------------|---------|-------------------------|---------|-------------------------|---------|-------------------------------|---------|-------------------------|---------|
|         |            |                                     |      | Exp $\beta$<br>(95% CI) | p-value | Exp $\beta$<br>(95% CI)               | p-value | Exp $\beta$<br>(95% CI) | p-value | Exp $\beta$<br>(95% CI) | p-value | Exp $\beta$<br>(95% CI) | p-value | Exp $\beta$<br>(95% CI)       | p-value | Exp $\beta$<br>(95% CI) | p-value |
| MCF     | SABRE      | <i>APOE</i> $\epsilon 4$ -linear    | 158  | 1.00<br>(0.94, 1.08)    | 0.901   | 1.01<br>(0.94, 1.08)                  | 0.878   | 1.01<br>(0.94, 1.08)    | 0.779   | 1.00<br>(0.94, 1.07)    | 0.974   | 1.00<br>(0.94, 1.07)    | 0.984   | 1.01<br>(0.93, 1.10)          | 0.873   | 1.00<br>(0.94, 1.07)    | 0.985   |
|         | NSHD       | <i>APOE</i> $\epsilon 4$ -linear    | 916  | 1.05<br>(0.95, 1.17)    | 0.354   | 1.05<br>(0.95, 1.17)                  | 0.340   | 1.06<br>(0.96, 1.18)    | 0.230   | 1.04<br>(0.93, 1.17)    | 0.525   | 1.02<br>(0.91, 1.14)    | 0.775   | 1.02<br>(0.91, 1.14)          | 0.802   | 1.04<br>(0.94, 1.16)    | 0.452   |
|         | SABRE+NSHD | Meta-analysis (linear)              | 2074 | 1.02<br>(0.96, 1.08)    | 0.544   | 1.02<br>(0.96, 1.08)                  | 0.516   | 1.03<br>(0.97, 1.09)    | 0.906   | 1.01<br>(0.95, 1.07)    | 0.729   | 1.00<br>(0.95, 1.07)    | 0.870   | 1.01<br>(0.94, 1.08)          | 0.780   | 1.01<br>(0.96, 1.07)    | 0.670   |
|         | SABRE      | <i>APOE</i> $\epsilon 4$ -quadratic | 1158 | 0.98<br>(0.93, 1.03)    | 0.350   | 0.98<br>(0.93, 1.03)                  | 0.356   | 0.98<br>(0.94, 1.03)    | 0.404   | 0.98<br>(0.94, 1.03)    | 0.381   | 0.98<br>(0.94, 1.03)    | 0.460   | 0.98<br>(0.93, 1.04)          | 0.499   | 0.98<br>(0.93, 1.03)    | 0.350   |
|         | NSHD       | <i>APOE</i> $\epsilon 4$ -quadratic | 916  | 0.99<br>(0.92, 1.06)    | 0.713   | 0.98<br>(0.92, 1.06)                  | 0.664   | 1.00<br>(0.93, 1.07)    | 0.980   | 0.98<br>(0.91, 1.07)    | 0.660   | 0.96<br>(0.89, 1.04)    | 0.315   | 0.95<br>(0.88, 1.03)          | 0.171   | 0.99<br>(0.92, 1.06)    | 0.676   |
|         | SABRE+NSHD | Meta-analysis (quadratic)           | 2074 | 0.98<br>(0.93, 1.03)    | 0.475   | 0.98<br>(0.93, 1.03)                  | 0.451   | 0.99<br>(0.94, 1.04)    | 0.675   | 0.98<br>(0.94, 1.02)    | 0.327   | 0.98<br>(0.94, 1.02)    | 0.251   | 0.97<br>(0.92, 1.01)          | 0.174   | 0.98<br>(0.94, 1.02)    | 0.312   |

The *APOE*  $\epsilon 4$  genotypes were coded as an ordered category based on the number of  $\epsilon 4$  possessed. Thus, level 0 encompassed  $\epsilon 2\epsilon 2$ ,  $\epsilon 2\epsilon 3$ ,  $\epsilon 2\epsilon 3$ ; level 1  $\epsilon 2\epsilon 4$  and  $\epsilon 3\epsilon 4$ ; and level 2  $\epsilon 4\epsilon 4$ . Given the existence of three levels, generalized linear models with gamma distribution and orthogonal polynomial contrasts with 2 equally spaced levels (i.e., linear and quadratic) were employed to look for a dose response by  $\epsilon 4$  variants.

Model 2 was not adjusted for age in NSHD as all participants are age-matched.

Abbreviations as in **Supplementary Tables S1/S2**.

**Supplementary Table S4. Associations between *APOE*  $\epsilon 4$  genotypes and echocardiographic data at 60-64 years by comparing non-*APOE*  $\epsilon 4$  ( $\epsilon 2\epsilon 2$ ,  $\epsilon 2\epsilon 3$ ,  $\epsilon 2\epsilon 3$ ) with heterozygous-*APOE*  $\epsilon 4$  ( $\epsilon 2\epsilon 4$  and  $\epsilon 3\epsilon 4$ ) and homozygous-*APOE*  $\epsilon 4$  ( $\epsilon 4\epsilon 4$ ) genotypes.**

| Outcome | Cohort | Analysis                                  | n    | M1<br>(unadjusted)         |              | M2<br>(adjusted for age,<br>sex and SEP) |              | M3<br>(M2 + BMI)           |              | M4<br>(M2 + CVD)           |              | M5<br>(M2 + diabetes)      |              | M6<br>(M2 +<br>high cholesterol) |              | M7<br>(M2 + HT)            |              |
|---------|--------|-------------------------------------------|------|----------------------------|--------------|------------------------------------------|--------------|----------------------------|--------------|----------------------------|--------------|----------------------------|--------------|----------------------------------|--------------|----------------------------|--------------|
|         |        |                                           |      | Exp $\beta$<br>(95%<br>CI) | p-<br>value  | Exp $\beta$<br>(95%<br>CI)               | p-<br>value  | Exp $\beta$<br>(95%<br>CI) | p-<br>value  | Exp $\beta$<br>(95%<br>CI) | p-<br>value  | Exp $\beta$<br>(95%<br>CI) | p-<br>value  | Exp $\beta$<br>(95%<br>CI)       | p-<br>value  | Exp $\beta$<br>(95%<br>CI) | p-<br>value  |
| MCF     | SABRE  | Heterozygous-<br><i>APOE</i> $\epsilon 4$ | 1129 | 1.03<br>(1.00,<br>1.07)    | 0.089        | 1.03<br>(1.00,<br>1.07)                  | 0.086        | 1.03<br>(1.00,<br>1.07)    | 0.079        | 1.03<br>(0.99,<br>1.06)    | 0.139        | 1.02<br>(0.99,<br>1.06)    | 0.215        | 1.03<br>(0.99,<br>1.08)          | 0.201        | 1.03<br>(0.99,<br>1.07)    | 0.121        |
|         | NSHD   | Heterozygous-<br><i>APOE</i> $\epsilon 4$ | 890  | 1.05<br>(1.00,<br>1.12)    | 0.070        | 1.06<br>(1.00,<br>1.12)                  | 0.053        | 1.05<br>(0.99,<br>1.11)    | 0.104        | 1.05<br>(0.99,<br>1.12)    | 0.129        | 1.06<br>(1.00,<br>1.13)    | <b>0.049</b> | 1.08<br>(1.02,<br>1.15)          | <b>0.015</b> | 1.05<br>(0.99,<br>1.11)    | 0.098        |
|         | Both   | Meta-analysis                             | 2019 | 1.04<br>(1.01,<br>1.07)    | <b>0.016</b> | 1.04<br>(1.01,<br>1.07)                  | <b>0.013</b> | 1.04<br>(1.01,<br>1.07)    | <b>0.018</b> | 1.03<br>(1.00,<br>1.06)    | <b>0.043</b> | 1.03<br>(1.00,<br>1.07)    | 0.060        | 1.05<br>(1.00,<br>1.10)          | <b>0.040</b> | 1.03<br>(1.00,<br>1.06)    | <b>0.028</b> |
|         | SABRE  | Homozygous-<br><i>APOE</i> $\epsilon 4$   | 865  | 1.01<br>(0.92,<br>1.11)    | 0.901        | 1.01<br>(0.92,<br>1.11)                  | 0.882        | 1.02<br>(0.92,<br>1.12)    | 0.746        | 1.00<br>(0.91,<br>1.11)    | 0.971        | 1.00<br>(0.91,<br>1.10)    | 0.980        | 1.01<br>(0.90,<br>1.14)          | 0.883        | 1.00<br>(0.91,<br>1.11)    | 0.967        |
|         | NSHD   | Homozygous-<br><i>APOE</i> $\epsilon 4$   | 674  | 1.07<br>(0.93,<br>1.25)    | 0.353        | 1.08<br>(0.93,<br>1.25)                  | 0.336        | 1.09<br>(0.94,<br>1.26)    | 0.234        | 1.06<br>(0.90,<br>1.26)    | 0.485        | 1.02<br>(0.87,<br>1.21)    | 0.786        | 1.02<br>(0.87,<br>1.20)          | 0.842        | 1.06<br>(0.92,<br>1.23)    | 0.444        |
|         | Both   | Meta-analysis                             | 1539 | 1.03<br>(0.95,<br>1.11)    | 0.544        | 1.03<br>(0.95,<br>1.11)                  | 0.517        | 1.04<br>(0.96,<br>1.13)    | 0.350        | 1.02<br>(0.92,<br>1.10)    | 0.704        | 1.01<br>(0.93,<br>1.09)    | 0.874        | 1.01<br>(0.92,<br>1.11)          | 0.812        | 1.02<br>(0.94,<br>1.10)    | 0.652        |

All reported analyses here consisted of generalized linear models with gamma distribution and log link. Significant *p*-values are highlighted in bold.

Model 2 was not adjusted for age in NSHD as all participants are age-matched.

Abbreviations as in **Supplementary Tables S1/S2**.

**Supplementary Table S5. Associations between *APOE*  $\epsilon 4$  genotypes and stroke volume data by comparing non-*APOE*  $\epsilon 4$  ( $\epsilon 2\epsilon 2$ ,  $\epsilon 2\epsilon 3$ ,  $\epsilon 2\epsilon 3$ ) with any *APOE*  $\epsilon 4$  ( $\epsilon 2\epsilon 4$ ,  $\epsilon 3\epsilon 4$  and  $\epsilon 4\epsilon 4$ ) genotypes in all cohorts.**

| Outcome: Stroke Volume |                                      | M1<br>(unadjusted) |                            |                     | M2<br>(adjusted for age,<br>sex and SEP) |                     | M3<br>(M2 + BMI)           |                     | M4<br>(M2 + CVD)        |                     | M5<br>(M2 + diabetes)      |                     | M6<br>(M2 +<br>high cholesterol) |                     | M7<br>(M2 + HT)            |                     |
|------------------------|--------------------------------------|--------------------|----------------------------|---------------------|------------------------------------------|---------------------|----------------------------|---------------------|-------------------------|---------------------|----------------------------|---------------------|----------------------------------|---------------------|----------------------------|---------------------|
| Cohort                 | <i>APOE</i> $\epsilon 4$<br>status   | n                  | Exp $\beta$<br>(95%<br>CI) | <i>p</i> -<br>value | Exp $\beta$<br>(95%<br>CI)               | <i>p</i> -<br>value | Exp $\beta$<br>(95%<br>CI) | <i>p</i> -<br>value | Exp $\beta$<br>(95% CI) | <i>p</i> -<br>value | Exp $\beta$<br>(95%<br>CI) | <i>p</i> -<br>value | Exp $\beta$<br>(95%<br>CI)       | <i>p</i> -<br>value | Exp $\beta$<br>(95%<br>CI) | <i>p</i> -<br>value |
| ALSPAC                 | No <i>APOE</i> $\epsilon 4$          | ref                | ref                        | ref                 | ref                                      | ref                 | ref                        | ref                 | ref                     | ref                 | ref                        | ref                 | ref                              | ref                 | ref                        | ref                 |
|                        | <i>APOE</i> $\epsilon 4$<br>carriers | 1333               | 0.99<br>(0.95,<br>1.04)    | 0.756               | 1.00<br>(0.95,<br>1.05)                  | 0.936               | 0.99<br>(0.95,<br>1.03)    | 0.613               | 0.99 (0.95,<br>1.04)    | 0.747               | 0.99<br>(0.95,<br>1.04)    | 0.953               | 0.98<br>(0.93,<br>1.03)          | 0.442               | 0.99<br>(0.94,<br>1.04)    | 0.616               |
| NSHD                   | No <i>APOE</i> $\epsilon 4$          | ref                | ref                        | ref                 | ref                                      | ref                 | ref                        | ref                 | ref                     | ref                 | ref                        | ref                 | ref                              | ref                 | ref                        | ref                 |
|                        | <i>APOE</i> $\epsilon 4$<br>carriers | 1229               | 1.08<br>(1.03,<br>1.12)    | <b>0.001</b>        | 1.06<br>(1.02,<br>1.10)                  | <b>0.006</b>        | 1.08<br>(1.03,<br>1.12)    | <b>0.001</b>        | 1.07 (1.02,<br>1.12)    | <b>0.007</b>        | 1.08<br>(1.04,<br>1.13)    | <b>0.0006</b>       | 1.07<br>(1.02,<br>1.12)          | <b>0.008</b>        | 1.08<br>(1.03,<br>1.12)    | <b>0.001</b>        |
| SABRE                  | No <i>APOE</i> $\epsilon 4$          | ref                | ref                        | ref                 | ref                                      | ref                 | ref                        | ref                 | ref                     | ref                 | ref                        | ref                 | ref                              | ref                 | ref                        | ref                 |
|                        | <i>APOE</i> $\epsilon 4$<br>carriers | 1160               | 1.02<br>(0.99,<br>1.05)    | 0.211               | 1.02<br>(0.99,<br>1.05)                  | 0.148               | 1.02<br>(1.00,<br>1.05)    | 0.090               | 1.02 (0.99,<br>1.05)    | 0.248               | 1.02<br>(0.99,<br>1.05)    | 0.306               | 1.02<br>(0.99,<br>1.06)          | 0.228               | 1.02<br>(0.99,<br>1.05)    | 0.233               |
| UK Biobank             | No <i>APOE</i> $\epsilon 4$          | ref                | ref                        | ref                 | ref                                      | ref                 | ref                        | ref                 | ref                     | ref                 | ref                        | ref                 | ref                              | ref                 | ref                        | ref                 |
|                        | <i>APOE</i> $\epsilon 4$<br>carriers | 32644              | 1.00<br>(1.00,<br>1.01)    | 0.220               | 1.00<br>(1.00,<br>1.01)                  | 0.068               | 1.01<br>(1.00,<br>1.01)    | 0.060               | 1.00 (1.00,<br>1.01)    | 0.275               | 1.00<br>(1.00,<br>1.01)    | 0.230               | 1.00<br>(1.00,<br>1.01)          | 0.233               | 1.00<br>(1.00,<br>1.01)    | 0.185               |

All reported analyses here consisted of generalized linear models with gamma distribution and log link. Significant *p*-values are highlighted in bold.

Model 2 was not adjusted for age in NSHD as all participants are age-matched.

Abbreviations as in **Supplementary Tables S1/S2**.
